# Supplementary material for: Spiny projection neurons exhibit transcriptional signatures within subregions of the dorsal striatum
Source: PubMed Central journal article supplement — Cell Rep. Author manuscript; Available in PMC 2024 Feb 5. (PMC10841649; doi:10.1016/j.celrep.2023.113435), 2023-11-11
Supplement: NIHMS1948213-supplement-1.pdf [file NIHMS1948213-supplement-1.pdf]

**Cell Reports, Volume 42**

**Supplemental information**

**Spiny projection neurons exhibit transcriptional  
signatures within subregions  
of the dorsal striatum**

**Kaitlyn M. Roman, Ashok R. Dinasarapu, Alison VanSchoiack, P. Martin Ross, David  
Kroeppler, H.A. Jinnah, and Ellen J. Hess**

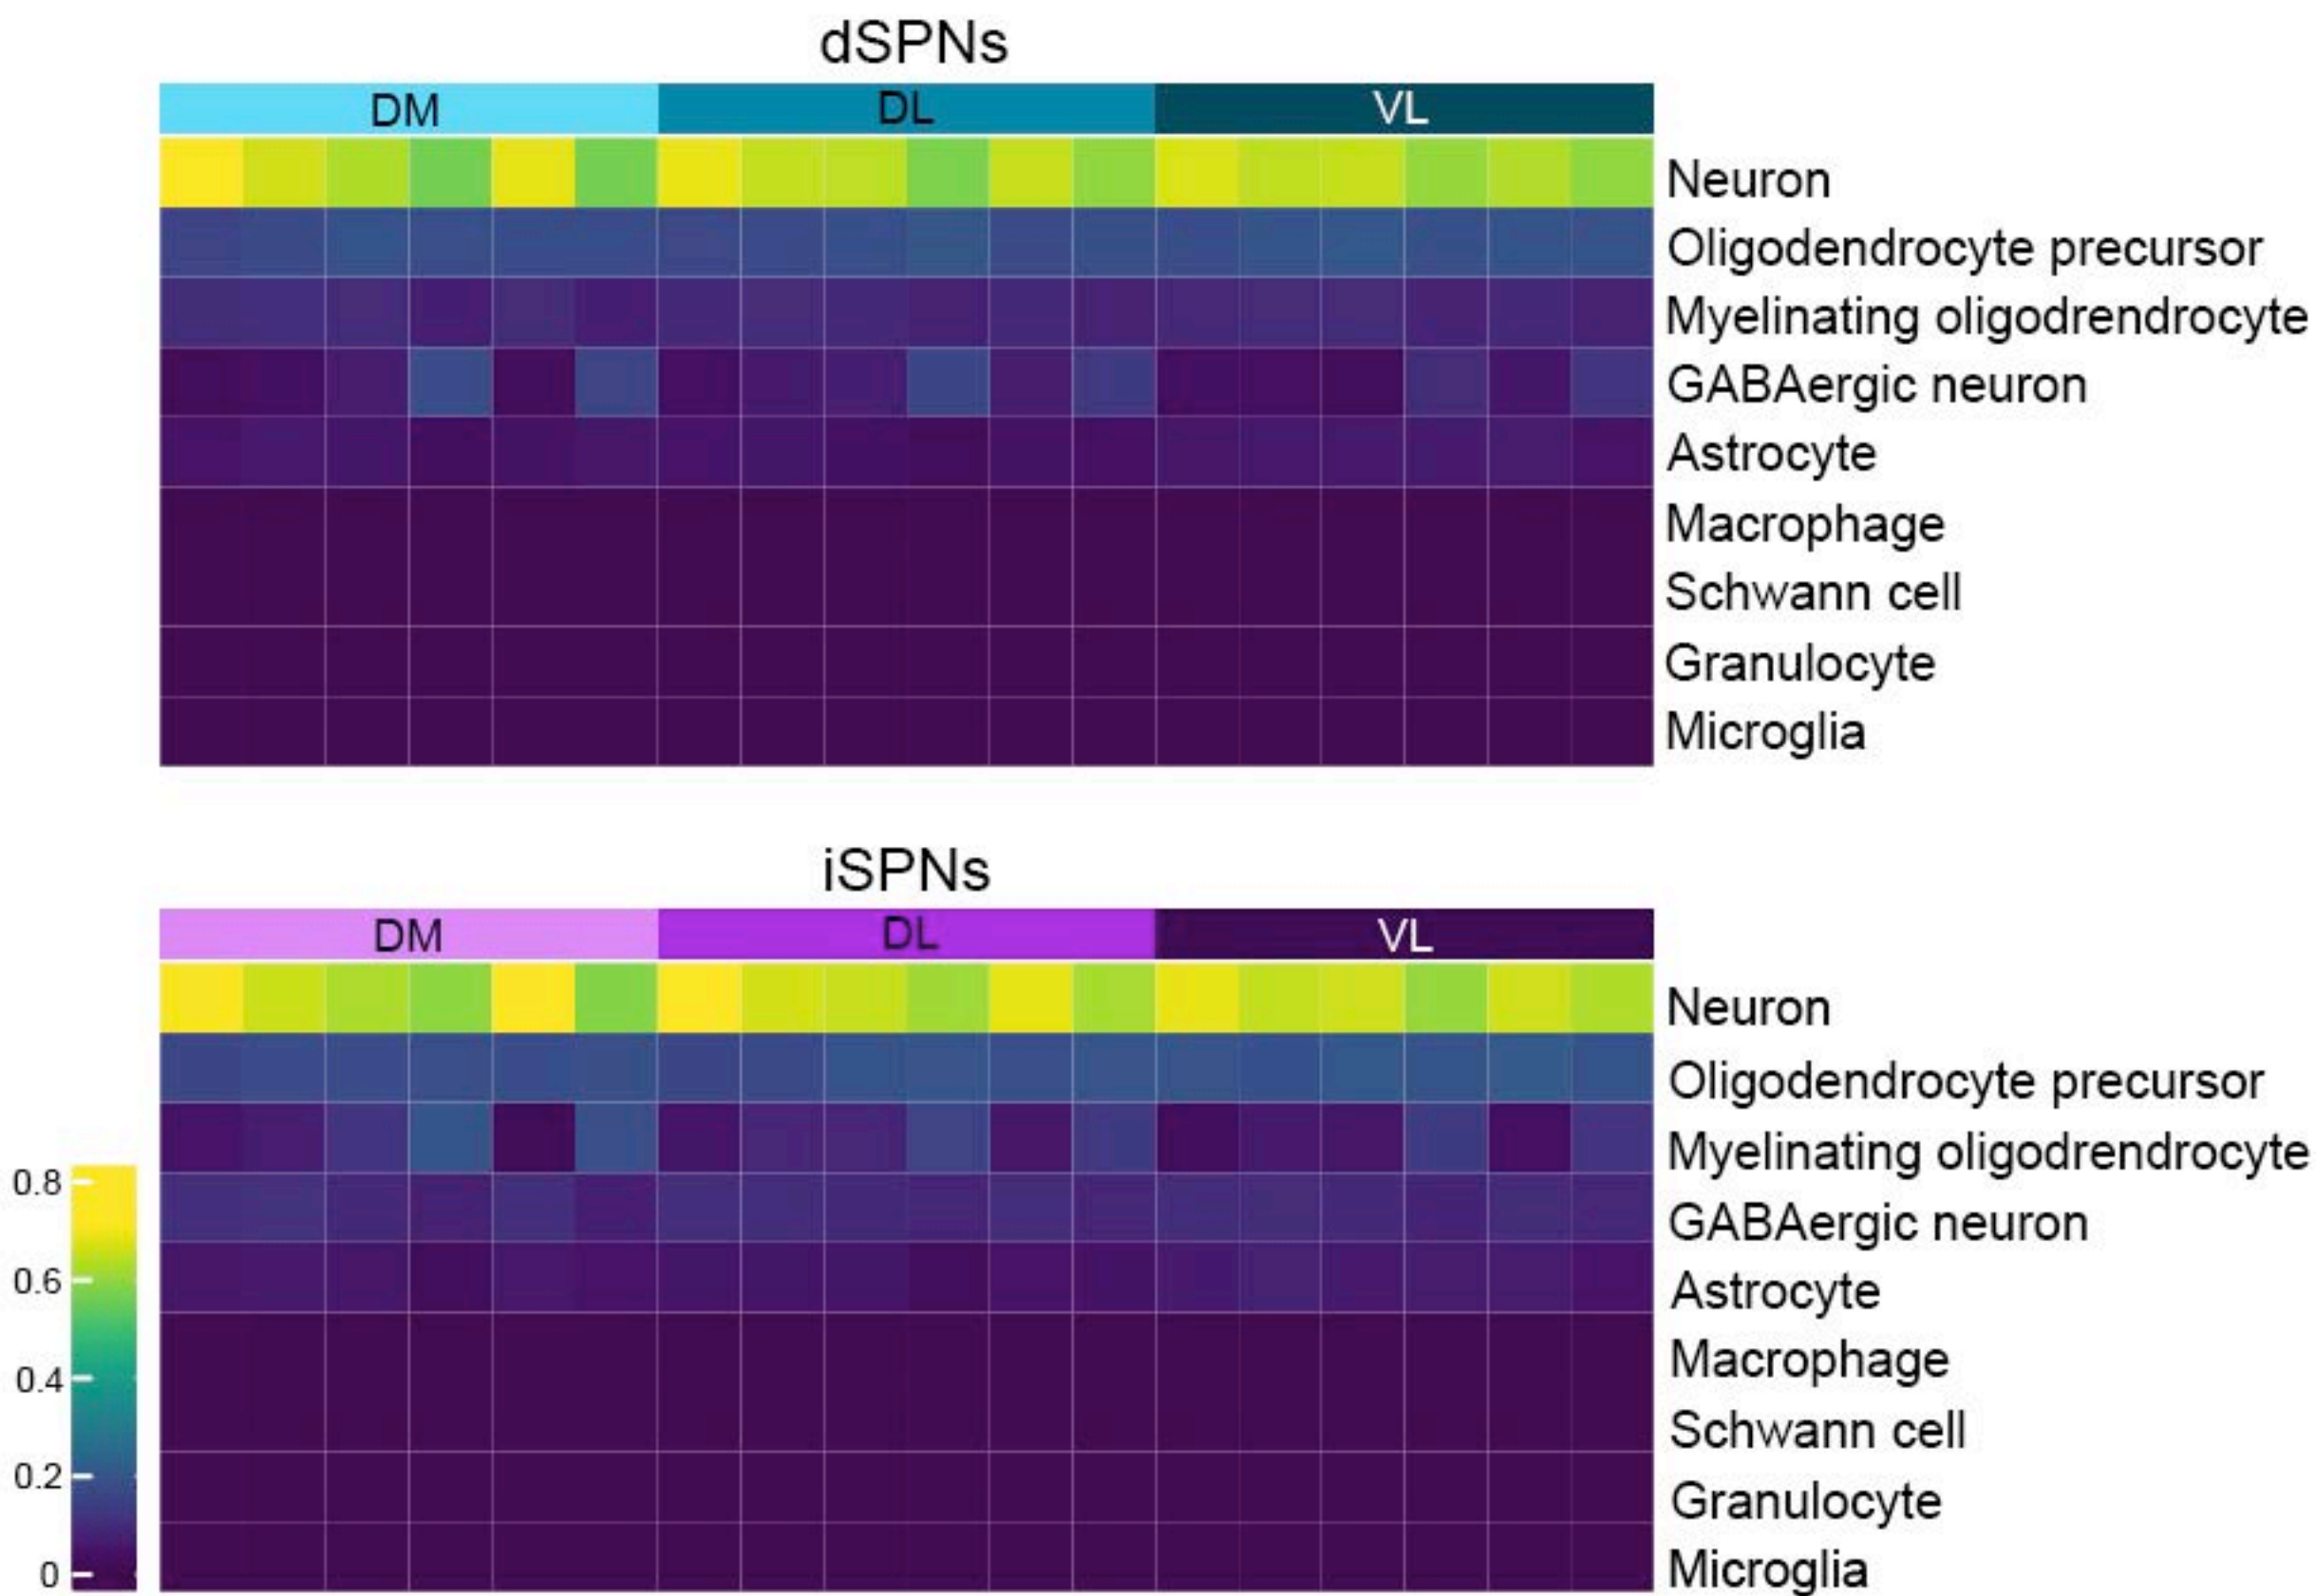

Figure S1. The majority of cells sampled were neuronal based on spatial deconvolution, related to Figure 1. Normalized gene expression data was used along with the Adult-Brain\_MCA cell profile matrix as cell markers. Scale bar represents proportion of cells sampled. Abbreviations are: dorsomedial (DM), dorsolateral (DL) and ventrolateral (VL).

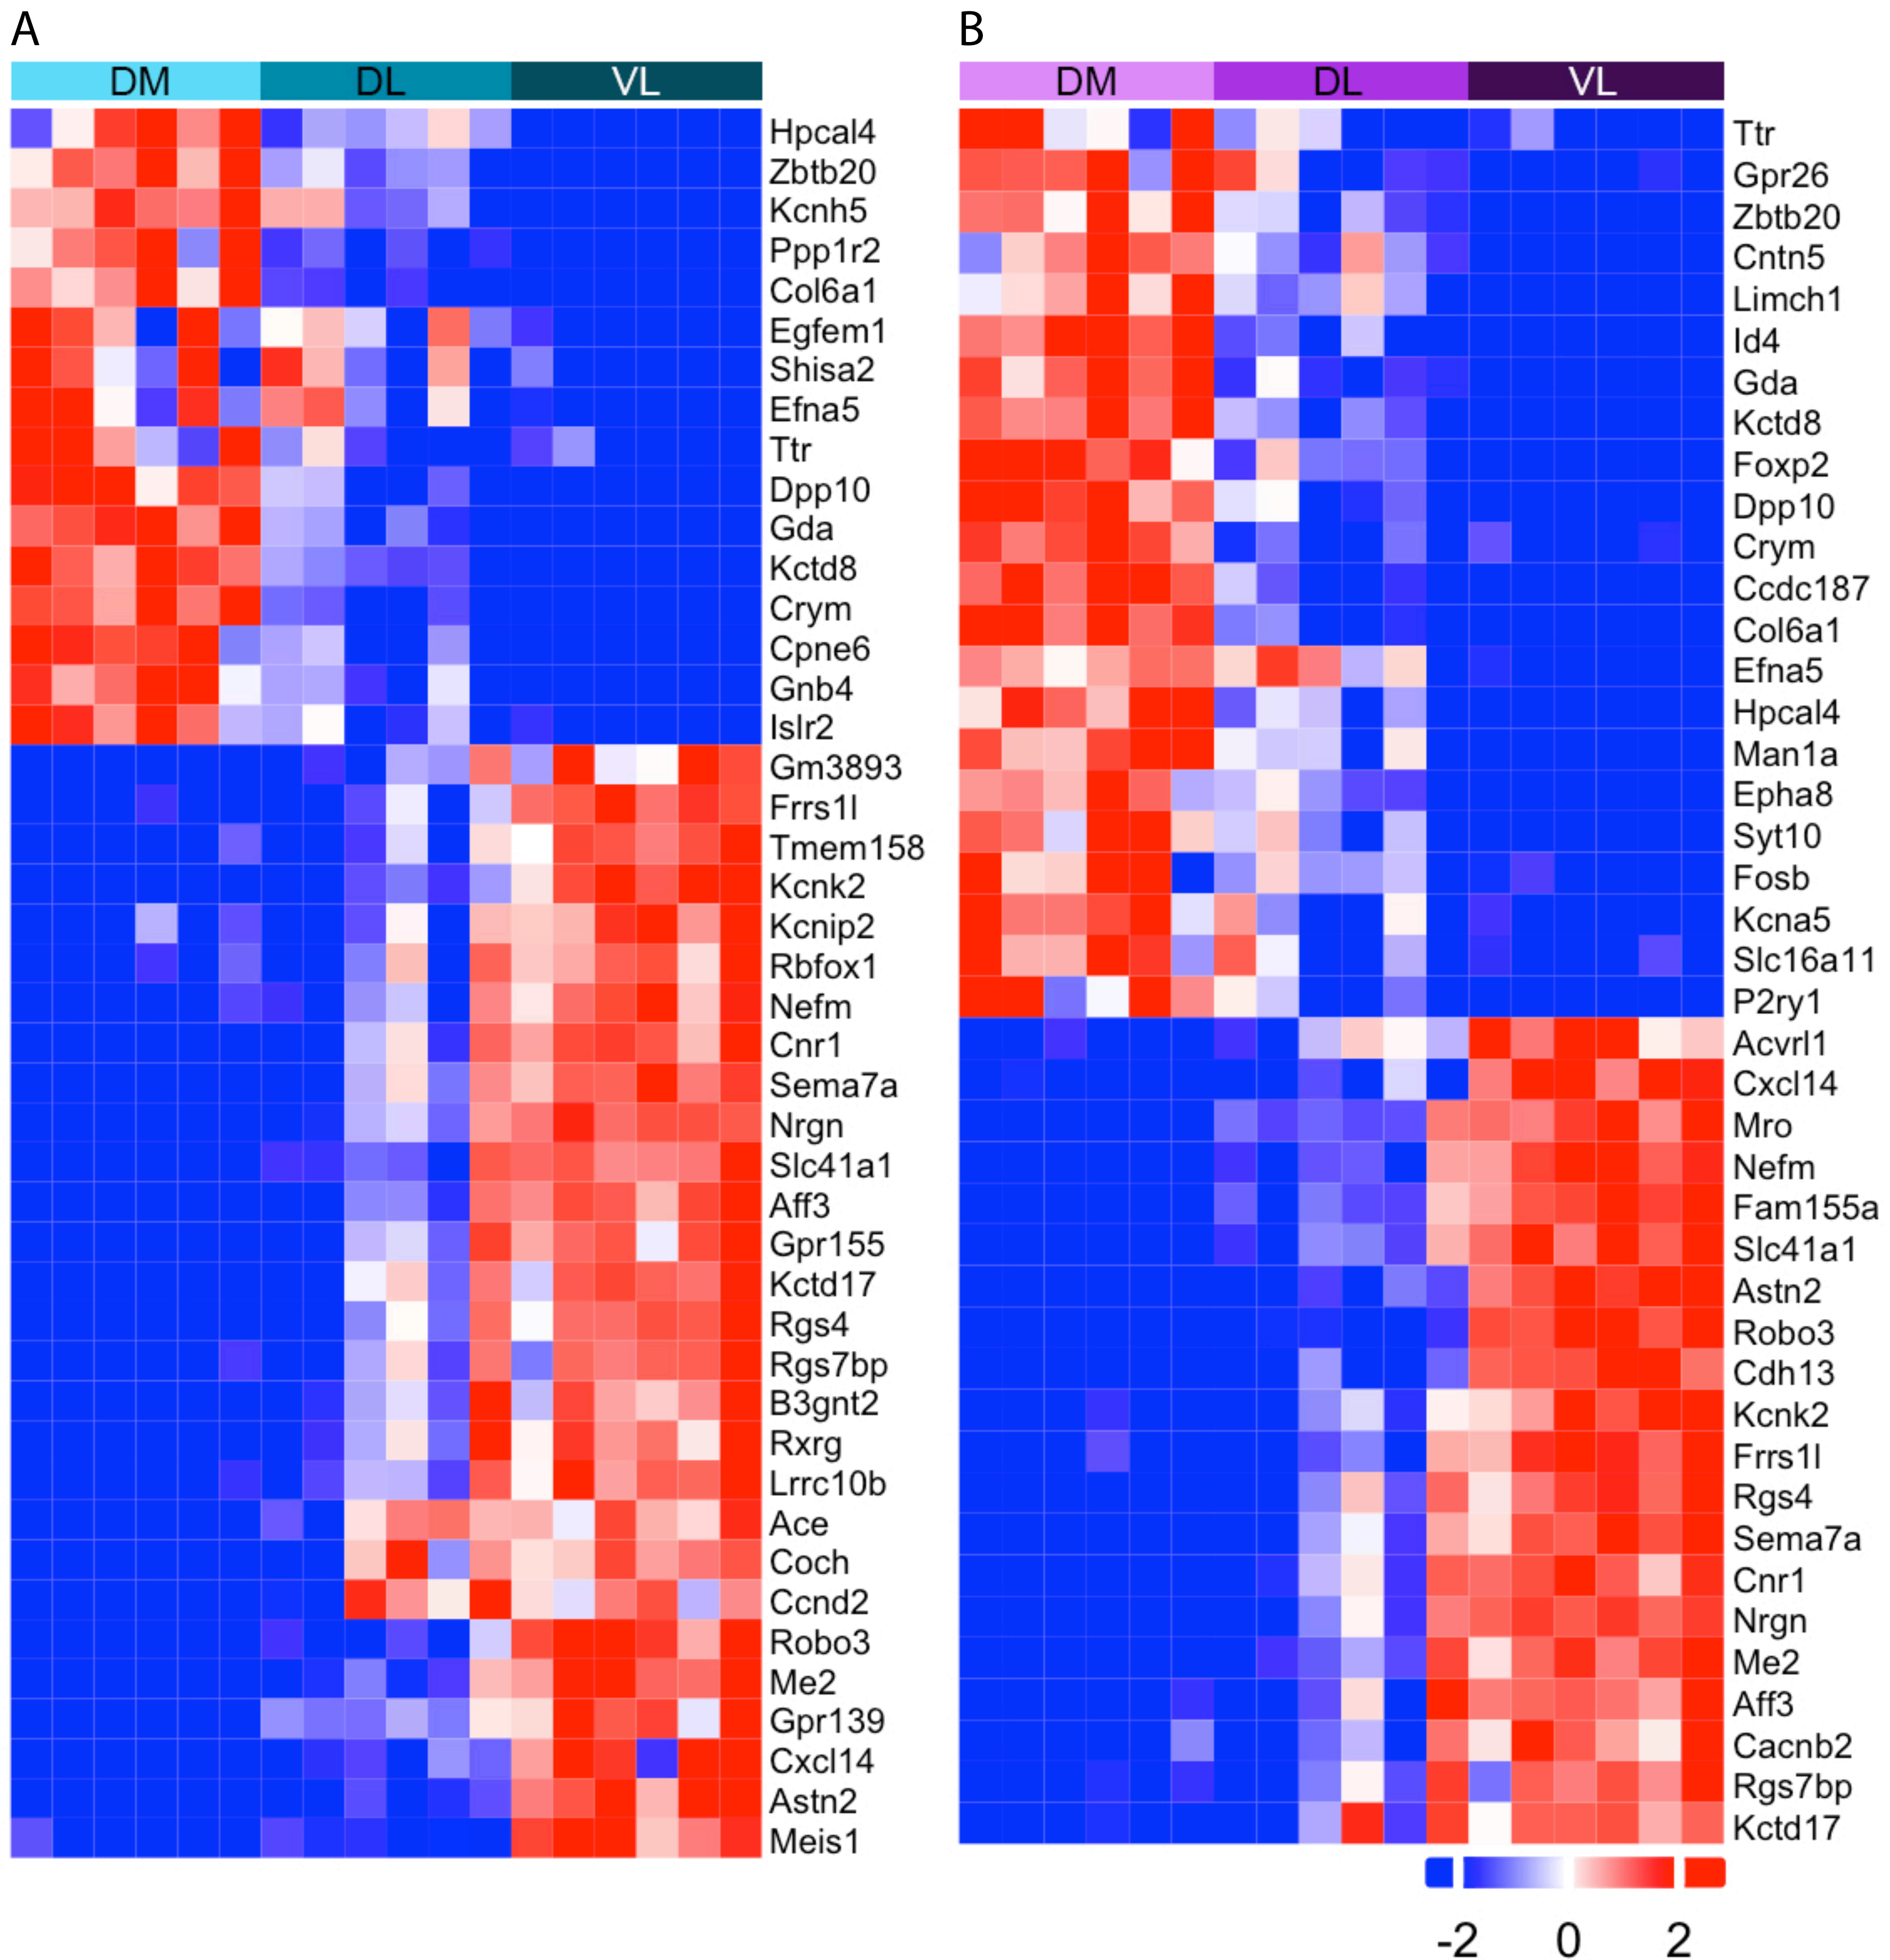

**Figure S2. Heatmaps illustrating gradients of gene expression in dorsomedial (DM), dorsolateral (DL) and ventrolateral (VL) striatum in dSPNs (A) and iSPNs (B), related to Figure 3.** Genes with > 2-fold change in gene expression between DM and VL are included. Each column within a region represents an individual animal (n=6); gene expression was assessed in every region and each SPN subtype for all mice. The order of animals is consistent across regions and cell types.

Table S1. Genes with >2-fold difference in expression between dorsomedial and ventrolateral striatum in dSPNs and/or iSPNs (p-adj < 0.01), Related to Figure 2

| Gene                                            | Gene product                                                  | Fold-change |       |
|-------------------------------------------------|---------------------------------------------------------------|-------------|-------|
|                                                 |                                                               | dSPNs       | iSPNs |
| <b>Genes enriched in dorsomedial striatum</b>   |                                                               |             |       |
| <i>Ccdc187</i>                                  | Coiled-coil domain containing 187                             | 1.664       | 2.337 |
| <i>Cntn5</i>                                    | contactin 5                                                   | 1.892       | 2.075 |
| <i>Col6a1</i>                                   | collagen, type VI alpha 1                                     | 6.431       | 5.320 |
| <i>Cpne6</i>                                    | copine VI                                                     | 2.143       | 1.845 |
| <i>Crym</i>                                     | crystallin mu                                                 | 3.331       | 2.650 |
| <i>Dpp10</i>                                    | dipeptidyl peptidase 10                                       | 2.708       | 2.692 |
| <i>Efna5</i>                                    | ephrin A5                                                     | 2.053       | 2.280 |
| <i>Egfm1</i>                                    | EGF-like and EMI domain containing 1                          | 2.102       | 1.732 |
| <i>Epha8</i>                                    | EPH receptor A8                                               | 1.923       | 2.183 |
| <i>Fosb</i>                                     | FosB proto-oncogene                                           | 1.776       | 2.206 |
| <i>Foxp2</i>                                    | forkhead box P2                                               | 1.222       | 2.016 |
| <i>Gda</i>                                      | guanine deaminase                                             | 2.196       | 2.159 |
| <i>Gnb4</i>                                     | G protein subunit beta 4                                      | 2.146       | 1.432 |
| <i>Gpr26</i>                                    | G protein-coupled receptor 26                                 | 1.906       | 2.362 |
| <i>Hpcal4</i>                                   | hippocalcin like 4                                            | 2.196       | 2.510 |
| <i>Id4</i>                                      | inhibitor of DNA binding 4                                    | 1.777       | 2.205 |
| <i>Islr2</i>                                    | immunoglobulin superfamily containing leucine rich repeat 2   | 2.271       | 1.973 |
| <i>Kcna5</i>                                    | potassium voltage-gated channel subfamily A member 5          | 1.863       | 2.037 |
| <i>Kcnh5</i>                                    | potassium voltage-gated channel subfamily H member 5          | 2.070       | 1.843 |
| <i>Kctd8</i>                                    | potassium channel tetramerisation domain containing 8         | 2.527       | 3.261 |
| <i>Limch1</i>                                   | LIM and calponin homology domains 1                           | 1.619       | 2.342 |
| <i>Man1a</i>                                    | mannosidase 1, alpha                                          | 1.537       | 2.140 |
| <i>P2ry1</i>                                    | purinergic receptor P2Y1                                      | 1.016       | 2.005 |
| <i>Ppp1r2</i>                                   | protein phosphatase 1 regulatory inhibitor subunit 2          | 2.145       | 1.804 |
| <i>Shisa2</i>                                   | shisa family member 2                                         | 2.017       | 1.770 |
| <i>Slc16a11</i>                                 | solute carrier family 16 member 11                            | 1.381       | 2.068 |
| <i>Syt10</i>                                    | synaptotagmin 10                                              | 1.634       | 2.413 |
| <i>Ttr</i>                                      | transthyretin                                                 | 2.380       | 2.459 |
| <i>Zbtb20</i>                                   | zinc finger and BTB domain containing 20                      | 2.321       | 2.087 |
| <b>Genes enriched in ventrolateral striatum</b> |                                                               |             |       |
| <i>Ace</i>                                      | angiotensin 1 converting enzyme                               | 2.123       | 1.820 |
| <i>Acvr1l</i>                                   | activin A receptor like type 1                                | 1.881       | 2.151 |
| <i>Aff3</i>                                     | ALF transcription elongation factor 3                         | 2.424       | 2.131 |
| <i>Astn2</i>                                    | astrotactin 2                                                 | 3.926       | 4.830 |
| <i>B3gnt2</i>                                   | UDP-GlcNAc:betaGal beta-1,3-N-acetylglucosaminyltransferase 2 | 2.091       | 1.759 |

|                |                                                        |       |       |
|----------------|--------------------------------------------------------|-------|-------|
| <i>Cacnb2</i>  | calcium voltage-gated channel auxiliary subunit beta 2 | 1.886 | 2.018 |
| <i>Ccnd2</i>   | cyclin D2                                              | 2.211 | 1.796 |
| <i>Cdh13</i>   | cadherin 13                                            | 1.529 | 2.118 |
| <i>Cnr1</i>    | cannabinoid receptor 1                                 | 5.711 | 5.048 |
| <i>Coch</i>    | cochlin                                                | 2.041 | 1.764 |
| <i>Cxcl14</i>  | C-X-C motif chemokine ligand 14                        | 2.953 | 2.522 |
| <i>Fam155a</i> | Family with sequence similarity 155 member A           | 1.691 | 2.067 |
| <i>Frrs11</i>  | ferric-chelate reductase 1 like                        | 2.236 | 2.114 |
| <i>Gm3893</i>  | predicted gene 3893                                    | 2.086 | 1.813 |
| <i>Gpr139</i>  | G protein-coupled receptor 139                         | 2.352 | 1.231 |
| <i>Gpr155</i>  | G protein-coupled receptor 155                         | 3.734 | 1.998 |
| <i>Kcnip2</i>  | potassium voltage-gated channel interacting protein 2  | 2.066 | 1.808 |
| <i>Kcnk2</i>   | potassium two pore domain channel subfamily K member 2 | 2.952 | 2.336 |
| <i>Kctd17</i>  | potassium channel tetramerisation domain containing 17 | 2.577 | 2.245 |
| <i>Lrrc10b</i> | leucine rich repeat containing 10B                     | 2.140 | 1.986 |
| <i>Me2</i>     | malic enzyme 2                                         | 2.820 | 2.608 |
| <i>Meis1</i>   | meis homeobox 1                                        | 2.416 | 1.550 |
| <i>Mro</i>     | maestro                                                | 1.837 | 2.605 |
| <i>Nefm</i>    | neurofilament medium polypeptide                       | 2.558 | 3.331 |
| <i>Nrgn</i>    | neurogranin                                            | 3.546 | 3.054 |
| <i>Rbfox1</i>  | RNA binding protein fox-1 homolog 1                    | 2.013 | 1.926 |
| <i>Rgs4</i>    | regulator of G protein signaling 4                     | 2.609 | 2.501 |
| <i>Rgs7bp</i>  | regulator of G protein signaling 7 binding protein     | 2.078 | 2.027 |
| <i>Robo3</i>   | roundabout guidance receptor 3                         | 3.461 | 6.118 |
| <i>Rxrg</i>    | retinoid X receptor gamma                              | 2.012 | 1.999 |
| <i>Sema7a</i>  | semaphorin 7A                                          | 2.758 | 2.766 |
| <i>Slc41a1</i> | solute carrier family 41 member 1                      | 2.177 | 2.156 |
| <i>Tmem158</i> | transmembrane protein 158                              | 2.109 | 1.818 |

---

Protein names obtained from the National Library of Medicine, National Center for Biotechnology Information.

Table S2. Genes with region-dependent expression in either dSPNs or iSPNs. Related to Figure 3

| <b>Gene</b>     | <b>Factor</b>      | <b>F (df1, df2)</b> | <b>P value</b> |
|-----------------|--------------------|---------------------|----------------|
| <i>Ano3</i>     | Region x cell type | F (2, 20) = 24.32   | P<0.0001       |
| <i>Atp6ap11</i> | Region x cell type | F (2, 20) = 8.012   | P=0.0028       |
| <i>Baiap3</i>   | Region x cell type | F (2, 20) = 5.588   | P=0.0118       |
| <i>Ceacam10</i> | Region x cell type | F (2, 20) = 5.391   | P=0.0134       |
| <i>Cfap77</i>   | Region x cell type | F (2, 20) = 3.533   | P=0.0485       |
| <i>Chrm4</i>    | Region x cell type | F (2, 20) = 25.54   | P<0.0001       |
| <i>Cntnap3</i>  | Region x cell type | F (2, 20) = 8.040   | P=0.0027       |
| <i>Foxp2</i>    | Region x cell type | F (2, 20) = 6.123   | P=0.0084       |
| <i>Galnt18</i>  | Region x cell type | F (2, 20) = 9.322   | P=0.0014       |
| <i>Galr1</i>    | Region x cell type | F (2, 20) = 4.006   | P=0.0344       |
| <i>Gm5741</i>   | Region x cell type | F (2, 20) = 3.606   | P=0.0460       |
| <i>Gpr139</i>   | Region x cell type | F (2, 20) = 16.63   | P<0.0001       |
| <i>Kcng1</i>    | Region x cell type | F (2, 20) = 12.89   | P=0.0003       |
| <i>Mfsd10</i>   | Region x cell type | F (2, 20) = 4.258   | P=0.0288       |
| <i>Myo5c</i>    | Region x cell type | F (2, 20) = 9.366   | P=0.0013       |
| <i>Necab1</i>   | Region x cell type | F (2, 20) = 118.8   | P<0.0001       |
| <i>Nt5e</i>     | Region x cell type | F (2, 20) = 16.44   | P<0.0001       |
| <i>P2ry1</i>    | Region x cell type | F (2, 20) = 7.551   | P=0.0036       |
| <i>Plxnd1</i>   | Region x cell type | F (2, 20) = 4.890   | P=0.0187       |
| <i>Rbp1</i>     | Region x cell type | F (2, 20) = 4.161   | P=0.0308       |
| <i>Serpine2</i> | Region x cell type | F (2, 20) = 18.01   | P<0.0001       |
| <i>Stum</i>     | Region x cell type | F (2, 20) = 3.912   | P=0.0368       |
| <i>Synpr</i>    | Region x cell type | F (2, 20) = 7.762   | P=0.0032       |
| <i>Zfp512</i>   | Region x cell type | F (2, 20) = 10.01   | P=0.0010       |

Results from two-way repeated measures ANOVAs with region as the repeated measure
